# Supplementary material for: Profound Impact of Hfq on Nutrient Acquisition, Metabolism and Motility in the Plant Pathogen Agrobacterium tumefaciens
Source: PLoS One. 2014 Oct 17;9(10):e110427. doi: 10.1371/journal.pone.0110427 (PMC4201532; doi:10.1371/journal.pone.0110427)
Supplement: Table S1 — Bacterial strains and plasmids used in this study. (XLSX) [file pone.0110427.s006.xlsx]

## Sheet: Tab. S1
Tab. S1: Bacterial strains and plasmids used in this study
Bacterial strains	Relevant characteristics	Reference
Agrobacterium tumefaciens
C58	wild-type	C. Baron, Montreal, Canada
C58 Δhfq	deletion of hfq (atu1450) open reading frame (ORF)	[31]
C58 hfq3xFlag	chromosomal integration of 3xFlag tag sequence at hfq 3' end (for additional information see “chromosomal integration of hfq3xFlag”)	this study
Escherichia coli
MG1655 kdtA::3XFLAG	chromosomal integration of 3xFlag tag sequence at kdtA 3’ end in E. coli K-12 wild-type	[41]
Plasmids	Relevant characteristics	Reference
pK19mobsacB	KanamycinR, suicide vector for mutagenesis	[42]
hfq_up_3xFlag_down, pBO2337	KanamycinR, upstream region including hfq ORF with additional 3' end 3xFlag fusion and downstream region (for additional information see “chromosomal integration of hfq3xFlag”)	this study
