# Supplementary material for: Profound Impact of Hfq on Nutrient Acquisition, Metabolism and Motility in the Plant Pathogen Agrobacterium tumefaciens
Source: PLoS One. 2014 Oct 17;9(10):e110427. doi: 10.1371/journal.pone.0110427 (PMC4201532; doi:10.1371/journal.pone.0110427)
Supplement: Table S2 — Oligonucleotides used in this study. (XLSX) [file pone.0110427.s007.xlsx]

## Sheet: Tab. S2
Tab. S2: Oligonucleotides used in this study
Restriction sites are underlined. T7 promoter sequences for in vitro transcription are written in bold letters.
Oligonucleotides	Sequence (5’ to 3’)
hfq3xFlag construction
hfq_up_PstI_fw	AAAACTGCAGCCGTCCGGATGGCAGC
hfq_up_SalI_rv	AAAAGTCGACGGCAGCGCCTTCTTCGC
hfq_down_Acc65I_fw	AAAAGGTACCTCAGGCTCCTTTAACGGTATC
hfq_down_EcoRI_rv	AAAAGAATTCCGACGGAACGGCCGGG
3xFlag_SalI_fw	AAAAGTCGACGACTACAAAGACCATGACGGTG
3xFlag_Acc65I_rv	AAAAGGTACCTCATTTATCGTCGTCATCTTTGTAG
RNA probes
RNAprobe_C1_fw	GAAGCGACGCACTCCTCCTC
RNAprobe_C1_rv	GAAATTAATACGACTCACTATAGGGCAAAAACCCGGCGCGGGAG
RNAprobe_C7_fw	CGGTTTGGAATGGTTGCGGC
RNAprobe_C7_rv	GAAATTAATACGACTCACTATAGGGCCCCGCTCACCTGGTAG
RNAprobe_AhaR_C_15_fw	CATTTGAACAGACTTAATGCTTCCCG
RNAprobe_AhaR_C_15_rv	GAAATTAATACGACTCACTATAGGGCAGCTCCGCCAGCATCTGG
RNAprobe_AhaR_C_17_fw	CCATCGCTCCCGGGCATTG
RNAprobe_AhaR_C_17_rv	GAAATTAATACGACTCACTATAGGGGAAAAAAGCCCCGCAAACGGG
RNAprobe_AhaR_C_26_fw	CAGCCAAGAACGAGCGACG
RNAprobe_AhaR_C_26_rv	GAAATTAATACGACTCACTATAGGGTGGAGCGGCGGGCGTAC
RNAprobe_atu0105_fw	CTGACTGACAATTGGGAGGAGG
RNAprobe_atu0105_rv	GAAATTAATACGACTCACTATAGGGCTACGCGGGCAGGCTTCAAG
RNAprobe_atu8023_fw	GGCTTATGACTGGAGCGGCG
RNAprobe_atu8023_rv	GAAATTAATACGACTCACTATAGGGCAGCCAAGAACGAGCGACGC
